# Supplementary material
Source: PubMed Central journal article supplement (PMC2376241)
Supplement: jbc_M800247200_1.pdf [file jbc_M800247200_1.pdf]

## SUPPLEMENTARY DATA LEGENDS

**Supplementary movie 1: Evolution of tau filament length distribution.** The time-dependent evolution of length distribution was calculated for 1  $\mu\text{M}$  tau from the parameters in **Table 1** (assuming  $n = 2$ ) in conjunction with Eq. 8 – 12 as described in Experimental Procedures. The distribution, which is peaked at all time points, is false colored so that warmer colors depict the highest relative concentrations. The highest concentration species at each time corresponds to the distribution mode. The simulations predict rapid formation of a stable mode, followed by a monotonously decreasing relative mode height as a function of time.
